# Supplementary material for: Peste des Petits Ruminants Virus Infection at the Wildlife–Livestock Interface in the Greater Serengeti Ecosystem, 2015–2019
Source: MDPI journal article supplement (doi:10.3390/v13050838), 2021-05-06
Supplement: s1 [file s1]

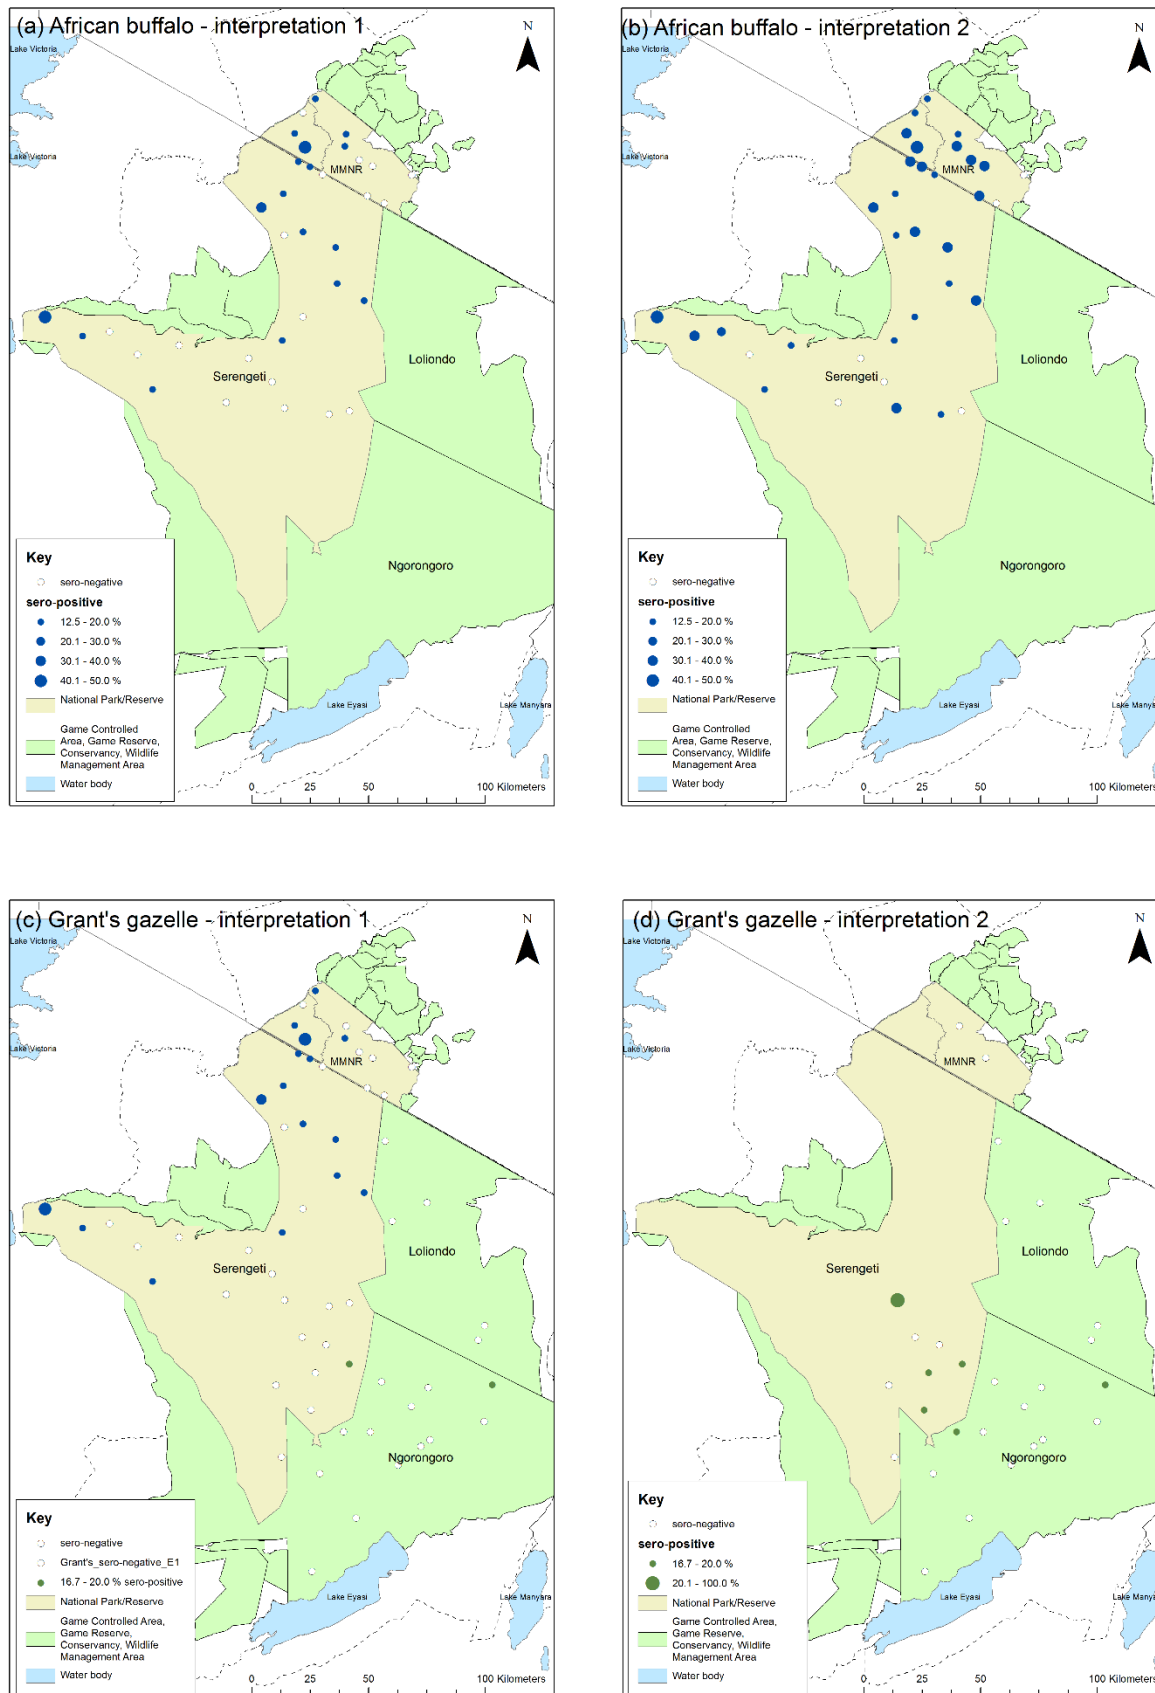

**Figure S1** Maps of sampling sites indicating the proportion of PPRV N cELISA positive animals at each site: **(a)** buffalo interpretation 1 (positive percentage inhibition (PI) <50); **(b)** buffalo interpretation 2 (positive PI <60); **(c)** Grant's gazelle interpretation 1; **(d)** Grant's gazelle interpretation 2.

**Table S1** Summary of serological results using interpretation 1 (positive PI <50) and interpretation 2 (positive PI <60)

| Variable               | Category        | Number sampled | Interpretation 1<br>Number positive (%; 95% CI)                                                              | Odds ratio (95% CI)<br>Wald test P value          | Interpretation 2<br>Number positive (%; 95% CI)                                                               | Odds ratio (95% CI)<br>Wald test P value          |
|------------------------|-----------------|----------------|--------------------------------------------------------------------------------------------------------------|---------------------------------------------------|---------------------------------------------------------------------------------------------------------------|---------------------------------------------------|
| Species                | African buffalo | 191            | 23 (12.04, 7.40-16.69)                                                                                       | 9.52 (2.13-42.57) p=0.003                         | 49 (25.65, 19.42-31.89)                                                                                       | 7.65 (3.17-18.44) p=<0.001                        |
|                        | Grant's gazelle | 139            | 2 (1.44, -0.55-3.43)                                                                                         | reference                                         | 6 (4.32, 0.91-7.72)                                                                                           | Reference                                         |
| Country                | Kenya           | 85             | 10 (11.76, 4.85-18.68)                                                                                       | 2.07 (0.73-5.85) p=0.17                           | 24 (28.24, 18.57-37.90)                                                                                       | 2.73 (1.47-5.06) p=0.001                          |
|                        | Tanzania        | 245            | 15 (6.12, 3.10-9.14)                                                                                         | reference                                         | 31 (12.65, 8.47-16.84)                                                                                        | reference                                         |
| Protected area         | Eastern MMNR    | 37             | 2 (5.41, 2.01-12.82)                                                                                         | 0.55 (0.11-2.86) p = 0.483                        | 9 (24.32, 10.26-38.39)                                                                                        | 1.39 (0.59-3.25) p=0.45                           |
|                        | Mara Triangle   | 48             | 8 (16.67, 5.97-27.36)                                                                                        | 2.05 (0.68-6.13) p=0.201                          | 15 (31.25, 17.95-44.55)                                                                                       | 1.96 (0.94-4.07) p=0.072                          |
|                        | Serengeti NP    | 154            | 14 (9.09, 4.52-13.66)                                                                                        | reference                                         | 29 (18.83, 12.61-25.05)                                                                                       | reference                                         |
|                        | NCA             | 67             | 1 (1.49, 1.44-4.43)                                                                                          | 0.15 (0.18-1.20) p=0.073                          | 2 (2.99, 1.14-7.11)                                                                                           | 0.13 (0.03-0.57) p=0.007                          |
|                        | Loliondo        | 24             | 0 (0)                                                                                                        | -                                                 | 0 (0)                                                                                                         | -                                                 |
| Age*                   | 0.5-<1          | 6              | 0 (0)                                                                                                        | 1.19 per 1 year increase<br>(1.04-1.37) p=0.011   | 0 (0)                                                                                                         | 1.11 per 1 year increase<br>(1.01-1.23) p=0.029   |
|                        | 1-<2            | 35             | 0 (0)                                                                                                        |                                                   | 3 (8.57)                                                                                                      |                                                   |
|                        | 2-<3            | 41             | 3 (7.32)                                                                                                     |                                                   | 7 (17.07)                                                                                                     |                                                   |
|                        | 3-<4            | 65             | 3 (4.62)                                                                                                     |                                                   | 10 (15.38)                                                                                                    |                                                   |
|                        | 4-<5            | 46             | 0 (0)                                                                                                        |                                                   | 3 (6.52)                                                                                                      |                                                   |
|                        | 5-<6            | 21             | 1 (4.76)                                                                                                     |                                                   | 2 (9.52)                                                                                                      |                                                   |
|                        | 6-<7            | 29             | 6 (20.69)                                                                                                    |                                                   | 10 (34.48)                                                                                                    |                                                   |
|                        | 7-<8            | 17             | 3 (17.65)                                                                                                    |                                                   | 4 (23.53)                                                                                                     |                                                   |
|                        | 8-<9            | 25             | 4 (16.00)                                                                                                    |                                                   | 6 (24.00)                                                                                                     |                                                   |
|                        | 9-<10           | 5              | 1 (20.00)                                                                                                    |                                                   | 1 (20.0)                                                                                                      |                                                   |
|                        | 10-<11          | 33             | 3 (9.09)                                                                                                     |                                                   | 7 (21.21)                                                                                                     |                                                   |
|                        | 11-<12          | 2              | 1 (50.00)                                                                                                    |                                                   | 1 (50.0)                                                                                                      |                                                   |
|                        | 12-<13          | 1              | 0 (0)                                                                                                        |                                                   | 0 (0)                                                                                                         |                                                   |
|                        | 13-<14          | 1              | 0 (0)                                                                                                        |                                                   | 0 (0)                                                                                                         |                                                   |
|                        | 14+             | 3              | 0 (0)                                                                                                        |                                                   | 1 (33.33)                                                                                                     |                                                   |
| Age category           | Young           | 6              | 0 (0)                                                                                                        | -                                                 | 0 (0)                                                                                                         | 0                                                 |
|                        | Sub-adult       | 70             | 3 (4.29, -0.52-9.08)                                                                                         | 0.52 (0.14-1.90) p=0.319                          | 10 (14.29, 6.00-22.57)                                                                                        | 0.86 (0.39-1.88) p=0.707                          |
|                        | Adult           | 213            | 17 (7.98, 4.32-11.64)                                                                                        | Reference                                         | 35 (16.43, 11.43-21.44)                                                                                       | Reference                                         |
|                        | aged            | 41             | 5 (12.20, 2.02-22.37)                                                                                        | 1.50 (0.47-4.72) p=0.491                          | 10 (24.39, 11.03-37.75)                                                                                       | 1.58 (0.68-3.66) p=0.283                          |
| Sex                    | Female          | 168            | 10 (5.95, 2.35-9.55)                                                                                         | Reference                                         | 26 (15.48, 10.00-20.98)                                                                                       | Reference                                         |
|                        | Male            | 162            | 15 (9.26, 4.77-13.75)                                                                                        | 1.51 (0.62-3.67) p=0.368                          | 29 (17.90, 11.96-23.84)                                                                                       | 1.14 (0.62-2.11) p=0.678                          |
| Herd size              | Range 1-900     | Median 50      | Mean herd size if sero-positive 201.84 (SD 210.68), if sero-negative 118.56 (SD 164.59) t-test p value 0.018 | 1.002 per 1 animal increase (1.000-1.005) p=0.048 | Mean herd size if sero-positive 187.04 (SD 197.55), if sero-negative 112.44 (SD 160.95) t-test p value 0.0028 | 1.002 per 1 animal increase (1.001-1.004) p=0.009 |
| Proximity to livestock | <10 km          | 217            | 14 (6.45, 3.16-9.74)                                                                                         | 0.76 (0.28-2.11) p=0.602                          | 31 (14.29, 9.60-18.97)                                                                                        | 0.61 (0.31-1.18) p=0.143                          |
|                        | >10 km          | 113            | 11 (9.73, 4.22-15.24)                                                                                        | reference                                         | 24 (21.24, 13.64-28.84)                                                                                       | Reference                                         |

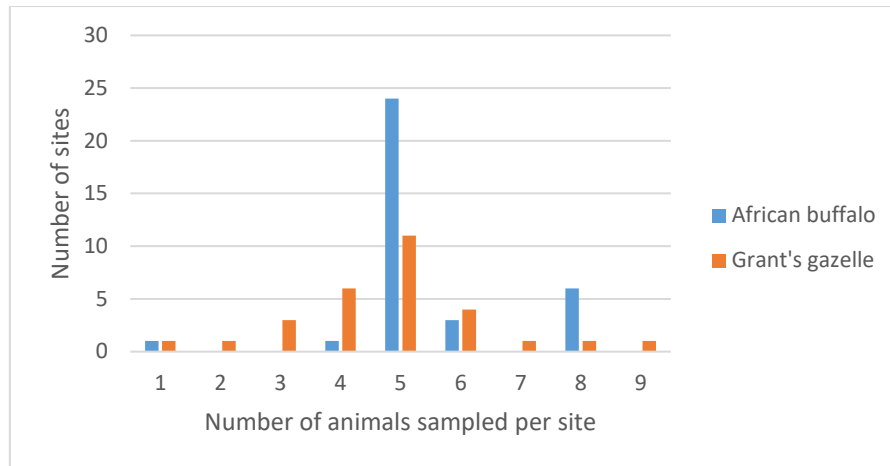

**Figure S2.** Number of animals sampled per site by species
